# Supplementary material
Source: MDPI journal article supplement (https://www.mdpi.com/1424-8247/16/6/780)
Supplement: s1 [file s1]

# ***Urtica dioica* leaf infusion enhances the sensitivity of triple-negative breast cancer cells to cisplatin treatment**

Guy Nafeh<sup>1</sup>, Maria Abi Akl<sup>1†</sup>, Jad Samarani<sup>1†</sup>, Rawane Bahous<sup>1</sup>, Georges Al Kari<sup>1</sup>, Maria Younes<sup>1</sup>, Rita Sarkis<sup>1,2</sup>  
and Sandra Rizk<sup>1\*</sup>

\*Correspondence: Corresponding author: [sandra.rizk@lau.edu.lb](mailto:sandra.rizk@lau.edu.lb)

**Supplementary Table (S1)**

|                                          | UD extract             |                       | Cisplatin            |                      |
|------------------------------------------|------------------------|-----------------------|----------------------|----------------------|
| <b>IC<sub>50</sub><br/>concentration</b> | 6.46 %v/v<br>(24hours) | 4.16%v/v<br>(48hours) | 32.21uM<br>(24hours) | 12.76uM<br>(48hours) |
| <b>Percent Viability</b>                 | 51.37 ± 2.55           | 51.28 ± 5.08          | 51.06 ± 4.83         | 47.96 ± 6.37         |

**Table S1:** Cell viability of MDA-MB-231 in response to treatment with IC<sub>50</sub> concentrations of UD and Cisplatin for 24 and 48hours.
